# Supplementary material
Source: PubMed Central journal article supplement (PMC5902656)
Supplement: NIHMS937183-supplement-supplement_1.pdf [file NIHMS937183-supplement-supplement_1.pdf]

693 Copyright WILEY-VCH Verlag GmbH & Co. KGaA, 69469 Weinheim, Germany,  
694 2013.

695

## 696 Supporting Information

697

698

699 **Biodegradable nanoparticles enhanced adhesiveness of mussel-like hydrogels at**  
700 **tissue interface.**

701

702 Author(s), and Corresponding Author(s)\*

703 *Nikhil Pandey<sup>1,2</sup>, Amirhossein Hakamivala<sup>1,2</sup>, Cancan Xu<sup>1,2</sup>, Prashant Hariharan<sup>1,2</sup>,*

704 *Boris Radionov<sup>1,2</sup>, Zhong Huang<sup>1</sup>, Jun Liao<sup>1,2</sup>, Liping Tang<sup>1,2</sup>, Philippe Zimmern<sup>3</sup>,*

705 *Kytai T. Nguyen<sup>1,2</sup>\*, Yi Hong<sup>1,2</sup>\**

706 1. Department of Bioengineering, University of Texas at Arlington, Arlington, TX,

707 76010, USA

708 2. Joint Biomedical Engineering Program, University of Texas Southwestern Medical

709 Center, Dallas, TX 75390, USA

710 3. Department of Urology, University of Texas Southwestern Medical center, Dallas,

711 TX 75390, USA

712

713

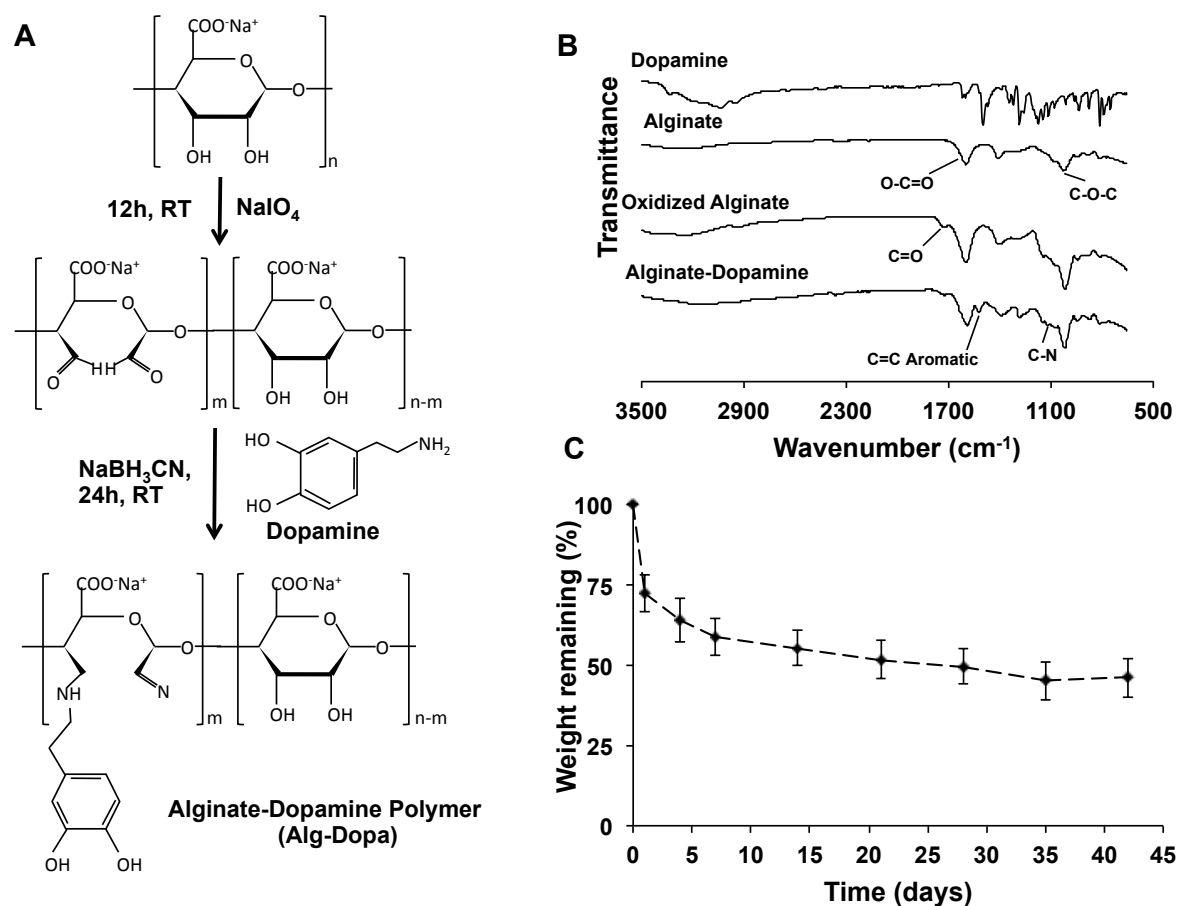

714  
 715 **Figure S1.** Alginate-Dopamine synthesis and characterization. (A) Synthetic scheme  
 716 of the oxidation of alginate and subsequent grafting of dopamine onto oxidized  
 717 alginate to achieve alginate-dopamine polymer (Alg-Dopa). (B) FTIR spectra of the  
 718 oxidized alginate and the dopamine grafted alginate (Alg-Dopa) to verify the grafting  
 719 of dopamine onto the alginate. (C) Degradation curve of alginate-dopamine polymer  
 720 in PBS at 37°C over a period of 45 days.

721  
 722

723

724

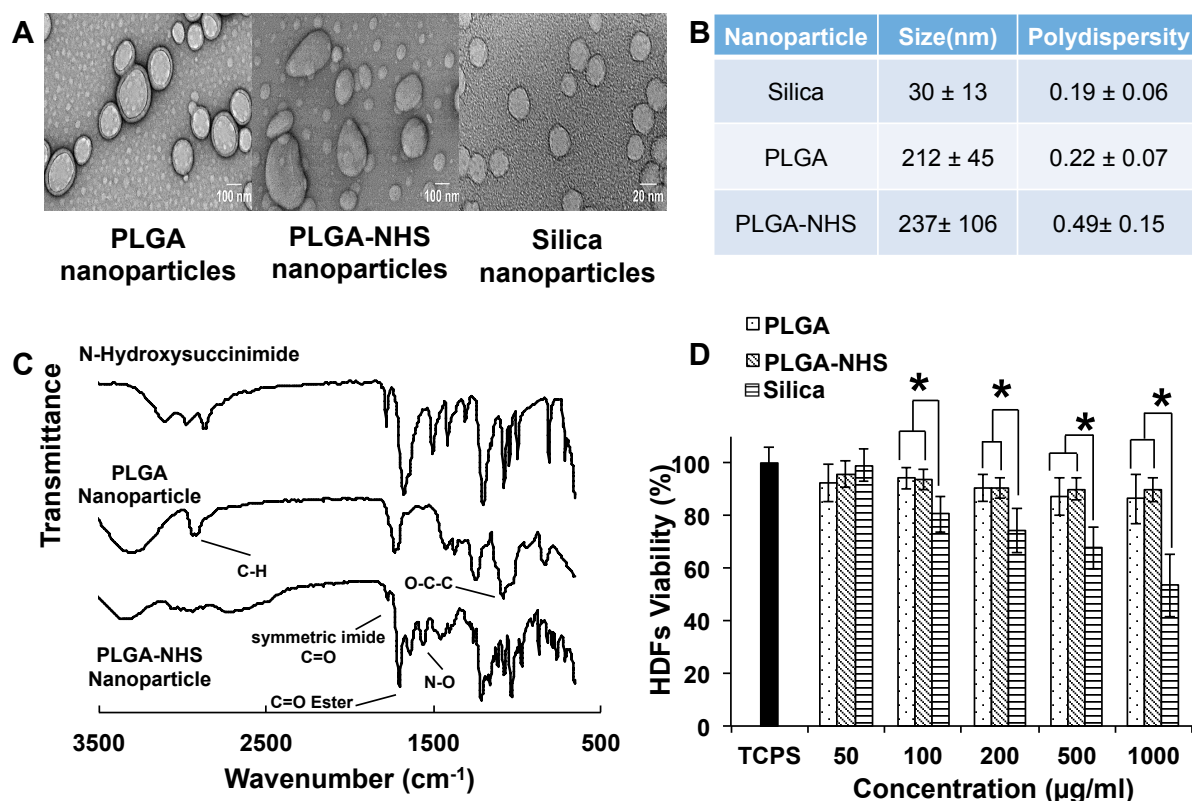

725

726 **Figure S2.** Nanoparticle characterization. (A) Transmission electron microscopy  
 727 images of PLGA, NHS modified PLGA (PLGA-NHS), and silica nanoparticles. (B)  
 728 A table list of hydrodynamic radius and polydispersity of nanoparticles measured via  
 729 dynamic light scattering. (C) FTIR spectra of NHS, PLGA nanoparticles, and PLGA-  
 730 NHS nanoparticles to verify NHS grafting. (D) Cell compatibility of PLGA, PLGA-  
 731 NHS and silica nanoparticles through co-culturing with human dermal fibroblasts  
 732 (HDFs). Tissue culture polystyrene (TCPS) was used as a control.

733

734

735

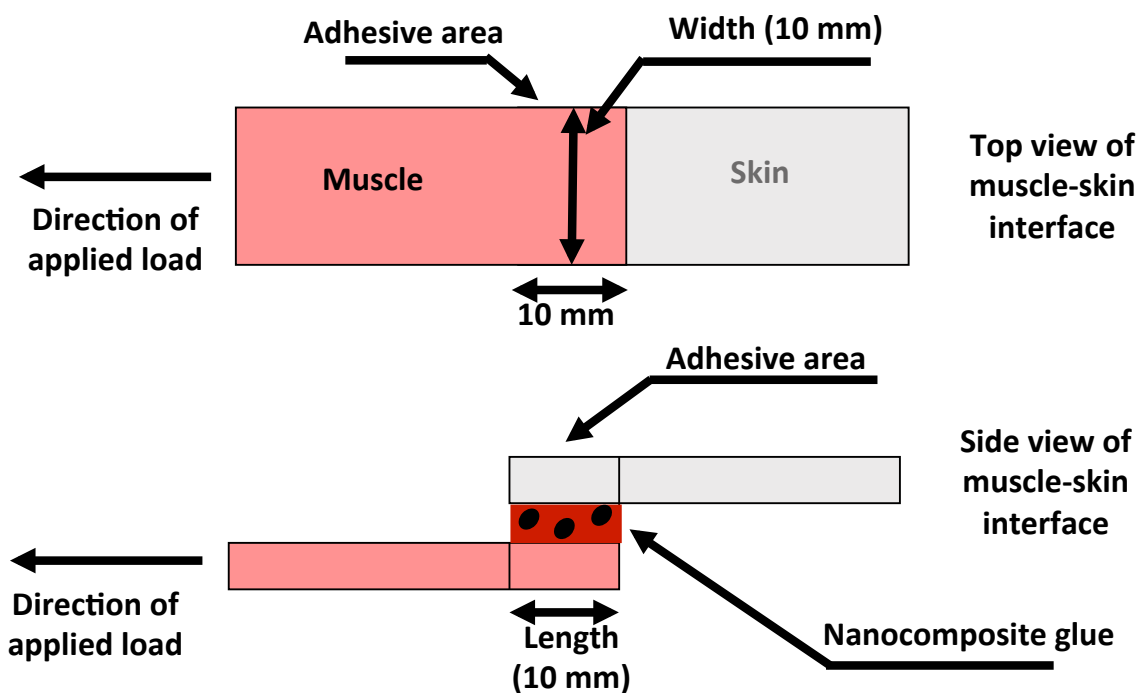

736

737

738 **Figure S3.** Schematic adhesive strength measurement size and technique. The  
739 schematic depicts the dimensions of the adhesive lap joint interface formed between  
740 the skin and muscle tissues and an overview of the uniaxial lap shear testing used to  
741 measure the adhesive strengths of the nanocomposite glues.
